# Supplementary material
Source: MDPI journal article supplement (https://www.mdpi.com/2076-0752/7/4/81)
Supplement: s1 [file s1]

Archive with 3 entries (3 files):
- Supplementary Material 2 Photography Rubric.pdf
- Supplementary Material 3 Sculpture Rubric.pdf
- Supplementary Material 1 Sample Assessment Criteria.pdf
