# Supplementary material
Source: MDPI journal article supplement (https://www.mdpi.com/2076-0752/7/4/81)
Supplement: s1 [file s1]

The Photographic Fine Print: Photography Assessment Rubric for Creative Works.

| <b>Criteria.<br/>Upon successful<br/>completion, you will<br/>be able to:</b>                       | <b>Exemplary<br/>High Distinction<br/>80–100</b>                                                                                                                                                                                                                                                                                                                                        | <b>Advancing<br/>Distinction<br/>70–79</b>                                                                                                                                                                                                                                                                                                                                                                                                                                                 | <b>Developing<br/>Credit<br/>60–69</b>                                                                                                                                                                                                                                                                                                                                                                                                                                                                                                    | <b>Commencing<br/>Pass<br/>50–59</b>                                                                                                                                                                                                                                                                                                                  | <b>Under-developed<br/>Fail<br/>0–49</b>                                                                                                                                                                                                                                                                            |
|-----------------------------------------------------------------------------------------------------|-----------------------------------------------------------------------------------------------------------------------------------------------------------------------------------------------------------------------------------------------------------------------------------------------------------------------------------------------------------------------------------------|--------------------------------------------------------------------------------------------------------------------------------------------------------------------------------------------------------------------------------------------------------------------------------------------------------------------------------------------------------------------------------------------------------------------------------------------------------------------------------------------|-------------------------------------------------------------------------------------------------------------------------------------------------------------------------------------------------------------------------------------------------------------------------------------------------------------------------------------------------------------------------------------------------------------------------------------------------------------------------------------------------------------------------------------------|-------------------------------------------------------------------------------------------------------------------------------------------------------------------------------------------------------------------------------------------------------------------------------------------------------------------------------------------------------|---------------------------------------------------------------------------------------------------------------------------------------------------------------------------------------------------------------------------------------------------------------------------------------------------------------------|
| <b>Creating Domain</b><br>Explore ideas and technologies to effectively create photographic prints. | The folio of images clearly aligns with the theme and chosen subjects. The images demonstrate an awareness of how other artists have worked within this genre. The images suggest experimentation and the effective engagement with ideas and creative intentions. There is consistent evidence in the images of the application of skills and knowledge learnt throughout the subject. | The folio evidences the consistent application of a thorough and measured approach to making works, and the images all clearly align with the theme and subject. There is evidence of research and awareness of how other artists and photographers explore similar themes as well as clear visual experimentation. To reach the next level a more reflexive process and/or experimentation with outcomes is required. This would be evident in reflecting more on re-shoots or re-prints. | The folio is an attempt to consider more complex imaging of the subject(s), and application of a thoughtful approach to the themes or investigation, however there is limited evidence of considered research or investigation of other artists and works. The submission is not consistent, and not all images are fully resolved to the same level, or demonstrate effective testing or experimentation. To reach the next level the folio would need to be complete to the same standard, more consistent in editing and printing, and | There is evidence of a thoughtful approach to the submitted body of work, however this is not considered beyond the simple framing of a subject. While there is evidence of experimentation, not all images in the folio are of the same standard, and a more rigorous approach to selection (perhaps even reshooting some images) would have helped. | No evidence, or limited evidence, of this criterion being met in the submitted work. There is not enough evidence of engagement in the folio. Either the required number of images were not submitted, or there is not enough evidence in the submitted work of sustained practice or investigation in the project. |

|                                                                                                                                                                                                                                    |                                                                                                                                                                                                                                                                                                                                                                                                        |                                                                                                                                                                                                                                                                                                                                                                                                                                                                                                                                        |                                                                                                                                                                                                                                                                                                                                                                                                                                                                                                                        |                                                                                                                                                                                                                                                                                                                                                                                                                                           |                                                                                                                                                                                                                                                                                                                         |
|------------------------------------------------------------------------------------------------------------------------------------------------------------------------------------------------------------------------------------|--------------------------------------------------------------------------------------------------------------------------------------------------------------------------------------------------------------------------------------------------------------------------------------------------------------------------------------------------------------------------------------------------------|----------------------------------------------------------------------------------------------------------------------------------------------------------------------------------------------------------------------------------------------------------------------------------------------------------------------------------------------------------------------------------------------------------------------------------------------------------------------------------------------------------------------------------------|------------------------------------------------------------------------------------------------------------------------------------------------------------------------------------------------------------------------------------------------------------------------------------------------------------------------------------------------------------------------------------------------------------------------------------------------------------------------------------------------------------------------|-------------------------------------------------------------------------------------------------------------------------------------------------------------------------------------------------------------------------------------------------------------------------------------------------------------------------------------------------------------------------------------------------------------------------------------------|-------------------------------------------------------------------------------------------------------------------------------------------------------------------------------------------------------------------------------------------------------------------------------------------------------------------------|
|                                                                                                                                                                                                                                    |                                                                                                                                                                                                                                                                                                                                                                                                        |                                                                                                                                                                                                                                                                                                                                                                                                                                                                                                                                        | demonstrate a more considered inquiry of the field.                                                                                                                                                                                                                                                                                                                                                                                                                                                                    |                                                                                                                                                                                                                                                                                                                                                                                                                                           |                                                                                                                                                                                                                                                                                                                         |
| <b>Processing Domain</b><br>Demonstrate reflective discoveries in process, including ways in which test prints have helped solve visual problems, as well as skills in analysis (identification) and critique (finding solutions). | Your creative interpretations of the subjects and content is consistent throughout the folio and demonstrates high level thinking and a sustained approach to research and investigation. Your prints also evidence an analytical approach to making, and it is clear that you are able to critically reflect on your work in the context of the field, and use this knowledge to produce your images. | You are reflecting on your work and clearly making choices based on these reflections, which is evidenced by a more complex realisation of your image content in print. Some of your prints evidence an analytical approach to making, although this is not consistent across all of the images. You demonstrate an awareness of your field and community of practice. To reach the next level focus on consistency and a more complex investigation of the ideas and concepts that exist within your field of research and community. | You demonstrate an awareness of your field of inquiry and community of practice, however while this is evident in some of the images, it is not consistent across the entire folio of work. Where it is evident, there is recognition of awareness, however it is not clear how this knowledge is being applied to the work. In order to achieve a higher level, you will need to be more analytical with works from your community, and explore the content and context of the work beyond what you see in the frame. | You are not effectively reflecting on your work and accepting results without a critical analysis of the prints. There are problems with content, which appears mostly as frames of a subject rather than any kind of creative interpretation of the subject. This is evidence that you need to focus more effectively on being aware of your field of inquiry and community of practice, and explore ways to consider this in your work. | No evidence, or limited evidence, of this criterion being met in the submitted work. There is not enough evidence of engagement in the folio, you have either not submitted the required number of images, or not provided enough evidence in the submitted work of sustained practice or investigation in the project. |
