# Supplementary material
Source: MDPI journal article supplement (https://www.mdpi.com/2076-0752/7/4/81)
Supplement: s1 [file s1]

**Sample Sculpture Assessment Rubric: Folio of Resolved Works.**

| <b>Criteria.</b>                                                                                                                                                                    | <b>Outstanding/Exemplary<br/>High Distinction 80–100</b>                                                                                                                                                                                                                                                                                                                                                                                                                                                                                                                                                                                                      | <b>Advancing/Developing<br/>Distinction or Credit 60–79</b>                                                                                                                                                                                                                                                                                                                                                                                                                                                                                          | <b>Commencing/Underdeveloped<br/>Pass or Fail 40–59</b>                                                                                                                                                                                                                                                                                                                                            |
|-------------------------------------------------------------------------------------------------------------------------------------------------------------------------------------|---------------------------------------------------------------------------------------------------------------------------------------------------------------------------------------------------------------------------------------------------------------------------------------------------------------------------------------------------------------------------------------------------------------------------------------------------------------------------------------------------------------------------------------------------------------------------------------------------------------------------------------------------------------|------------------------------------------------------------------------------------------------------------------------------------------------------------------------------------------------------------------------------------------------------------------------------------------------------------------------------------------------------------------------------------------------------------------------------------------------------------------------------------------------------------------------------------------------------|----------------------------------------------------------------------------------------------------------------------------------------------------------------------------------------------------------------------------------------------------------------------------------------------------------------------------------------------------------------------------------------------------|
| <b>Creating Domain</b><br><i>Work independently to instigate, develop and resolve artworks to effectively communicate your ideas.</i>                                               | <p>The folio has been produced independently and works are highly resolved using high-level and appropriate techniques and processes that link directly to conceptual ideas. The body of work is cohesive and carefully selected from a broader suite of experimental works. The work communicates via accomplished artistic production and explores sophisticated ideas that have been stretched and expanded in unexpected/interesting/experimental ways. Works are outstanding/exemplary/excellent and effectively attend to compositional and/or spatial relationships. Attention to detail demonstrates persistent and sustained practice over time.</p> | <p>On the whole, the folio has been produced independently and works are resolved using appropriate techniques for artistic production. There are clear links between preliminary works and resolved works and there is some cohesion to the works selected for folio presentation. The work clearly references the ideas being explored but not all aspects of the broader concepts are communicated through the execution of the final artworks. Works are accomplished and demonstrate developing/advancing capacity in an artistic practice.</p> | <p>The folio demonstrates an artistic practice that is commencing/underdeveloped. Works are somewhat resolved but have little/no cohesion as a collection for folio presentation. There is some/no link between preliminary works and resolved works. Works are limited/underdeveloped and not fully resolved. The work does not fully communicate the intended ideas that are being explored.</p> |
| <b>Creating Domain</b><br><i>Use and refine the craft, techniques and processes of your discipline, applying industry standard safe working practices to the making of artworks</i> | <p>The work is technically outstanding/exemplary and has been effectively and safely produced using media specific tools, equipment and processes at an industry standard level. The outcomes are refined and crafted with mediums carefully/appropriately selected for the expression of conceptual ideas.</p>                                                                                                                                                                                                                                                                                                                                               | <p>The work is technically proficient and has been safely produced using media specific tools, equipment and processes. The works are well crafted with some evidence of refinement. Appropriate techniques have been selected for the intended exploration of ideas.</p>                                                                                                                                                                                                                                                                            | <p>The work shows signs of technical competency but is inconsistent in application. On the whole the work is commencing/underdeveloped and has been produced using media specific tools, equipment and processes but there is little/no attention to detail. There is little/no evidence of applying industry standard work practices.</p>                                                         |
