# Supplementary material
Source: MDPI journal article supplement (https://www.mdpi.com/2076-0752/7/4/81)
Supplement: s1 [file s1 › Supplementary Material 1 Sample Assessment Criteria.pdf]

**Bachelor of Arts (Fine Art): Sample Assessment Criteria**

Assessment tasks in the Bachelor of Arts (Fine Art) program will focus on one or more of the following curriculum domains. Every assessment task whether it be an artefact, presentation or a form of writing should contain a range of assessment criteria, with a minimum of two criteria per assessment task.

| BA Fine Art Curriculum Domains                                                                                                                                                                                                                                    |                                                                                                                                                                                                                                                                                                                                                                                                                                                                                                                                                                                                                                                                                                                                                                                                                                                          |                                                                                                                                                                                                                                                                                                                                                                                                                                                                                                                                                                                                                                                                                                                                                                                                                                                                                                                                                                    |                                                                                                                                                                                                                                                                                                                                                                                                                                                                                                                                                                                                                                                                                                                                                                                                                                                                                                                                                                                                                                             |                                                                                                                                                                                                                                                                                                                                                                                                                                                                                                                                                                                                                                                                                                                                                                                                                                                                                                                                                                                                                                                                                                                                                             |                                                                                                                                                                                                                                                                                                                                                                                                                                                                                                                                                                                                                                                                                                                                                                                                                                                                                                                                                                                                                                                                                                                                                        |
|-------------------------------------------------------------------------------------------------------------------------------------------------------------------------------------------------------------------------------------------------------------------|----------------------------------------------------------------------------------------------------------------------------------------------------------------------------------------------------------------------------------------------------------------------------------------------------------------------------------------------------------------------------------------------------------------------------------------------------------------------------------------------------------------------------------------------------------------------------------------------------------------------------------------------------------------------------------------------------------------------------------------------------------------------------------------------------------------------------------------------------------|--------------------------------------------------------------------------------------------------------------------------------------------------------------------------------------------------------------------------------------------------------------------------------------------------------------------------------------------------------------------------------------------------------------------------------------------------------------------------------------------------------------------------------------------------------------------------------------------------------------------------------------------------------------------------------------------------------------------------------------------------------------------------------------------------------------------------------------------------------------------------------------------------------------------------------------------------------------------|---------------------------------------------------------------------------------------------------------------------------------------------------------------------------------------------------------------------------------------------------------------------------------------------------------------------------------------------------------------------------------------------------------------------------------------------------------------------------------------------------------------------------------------------------------------------------------------------------------------------------------------------------------------------------------------------------------------------------------------------------------------------------------------------------------------------------------------------------------------------------------------------------------------------------------------------------------------------------------------------------------------------------------------------|-------------------------------------------------------------------------------------------------------------------------------------------------------------------------------------------------------------------------------------------------------------------------------------------------------------------------------------------------------------------------------------------------------------------------------------------------------------------------------------------------------------------------------------------------------------------------------------------------------------------------------------------------------------------------------------------------------------------------------------------------------------------------------------------------------------------------------------------------------------------------------------------------------------------------------------------------------------------------------------------------------------------------------------------------------------------------------------------------------------------------------------------------------------|--------------------------------------------------------------------------------------------------------------------------------------------------------------------------------------------------------------------------------------------------------------------------------------------------------------------------------------------------------------------------------------------------------------------------------------------------------------------------------------------------------------------------------------------------------------------------------------------------------------------------------------------------------------------------------------------------------------------------------------------------------------------------------------------------------------------------------------------------------------------------------------------------------------------------------------------------------------------------------------------------------------------------------------------------------------------------------------------------------------------------------------------------------|
| Required Skills and Knowledge for practicing artists                                                                                                                                                                                                              | Creating<br><i>create, produce, make, respond, present, communicate</i>                                                                                                                                                                                                                                                                                                                                                                                                                                                                                                                                                                                                                                                                                                                                                                                  | Processing<br><i>develop, test, experiment, trial, take risks, explore methods, intuit, generate, document</i>                                                                                                                                                                                                                                                                                                                                                                                                                                                                                                                                                                                                                                                                                                                                                                                                                                                     | Researching<br><i>access, collect, collate, order, map, inform, reference, identify, contextualise</i>                                                                                                                                                                                                                                                                                                                                                                                                                                                                                                                                                                                                                                                                                                                                                                                                                                                                                                                                      | Analysing<br><i>reflect, think critically, connect, compare, evaluate, problem solve, synthesise</i>                                                                                                                                                                                                                                                                                                                                                                                                                                                                                                                                                                                                                                                                                                                                                                                                                                                                                                                                                                                                                                                        | Engaging<br><i>network, critique, collaborate, connect to industry, negotiate</i>                                                                                                                                                                                                                                                                                                                                                                                                                                                                                                                                                                                                                                                                                                                                                                                                                                                                                                                                                                                                                                                                      |
| Sample Assessment Criteria                                                                                                                                                                                                                                        | <b>Your work successfully demonstrates an ability to:</b>                                                                                                                                                                                                                                                                                                                                                                                                                                                                                                                                                                                                                                                                                                                                                                                                | <b>Your work successfully demonstrates an ability to:</b>                                                                                                                                                                                                                                                                                                                                                                                                                                                                                                                                                                                                                                                                                                                                                                                                                                                                                                          | <b>Your work successfully demonstrates an ability to:</b>                                                                                                                                                                                                                                                                                                                                                                                                                                                                                                                                                                                                                                                                                                                                                                                                                                                                                                                                                                                   | <b>Your work successfully demonstrates an ability to:</b>                                                                                                                                                                                                                                                                                                                                                                                                                                                                                                                                                                                                                                                                                                                                                                                                                                                                                                                                                                                                                                                                                                   | <b>Your work successfully demonstrates an ability to:</b>                                                                                                                                                                                                                                                                                                                                                                                                                                                                                                                                                                                                                                                                                                                                                                                                                                                                                                                                                                                                                                                                                              |
| <p>This is a list of sample criterion from which you may choose a subset that best reflects the learning objectives of your class.</p> <p>You can also further fine tune the wording of these criteria to customise for the context of your particular class.</p> | <ul style="list-style-type: none"><li>• Imagine, envisage and realize conceptual ideas</li><li>• Observe, listen and attend to compositional and/or spatial relationships</li><li>• Stretch and explore ideas/material/technologies</li><li>• Be technically proficient</li><li>• Use technical processes appropriately</li><li>• Develop particular skills that relate directly to own interests</li><li>• Express conceptual ideas</li><li>• Effectively communicate via artistic production</li><li>• Select appropriate methods and resources</li><li>• Work independently and/or collaboratively in response to project demands</li><li>• Engage with, persist and sustain studio practice</li><li>• Effectively and safely use equipment and media specific tools</li><li>• Clearly communicate and logically structure ideas in writing</li></ul> | <ul style="list-style-type: none"><li>• Realise potential for chance/accidents and unforeseen possibilities by working and thinking laterally</li><li>• Take risks and be flexible</li><li>• Experiment with and test techniques and processes</li><li>• Develop creative solutions to constraints and challenges in the process of making works</li><li>• Generate work without a fixed idea of what will happen</li><li>• Use intuition and embodied processes to create work</li><li>• Document feedback from lecturers and peers and discuss how this feedback has been responded to through the making process</li><li>• Explore and trial new theories of practice</li><li>• Embrace new developments in cultural/artistic production</li><li>• Document material/technical processes and reflect on how they influence/change/enhance/diminish/augment/galvanise your work</li><li>• Document your work in an appropriate format for presentation</li></ul> | <ul style="list-style-type: none"><li>• Use practice to lead research by exploring and experimenting with materials/technologies</li><li>• Link conceptual ideas to the use of materials/technologies</li><li>• Identify artists of influence for own work</li><li>• Map and order conceptual ideas and processes</li><li>• Discuss the historical/social/political context of own work and work of others</li><li>• Identify and reflect on social, cultural and ethical issues to inform and contextualize own work</li><li>• Make oral /visual/ aural presentations about own practice or work of others</li><li>• Research and discuss artists who have influenced your work</li><li>• Select and collate appropriate artwork(s)/exhibition(s)/art fair(s)/biennale(s) to support an argument</li><li>• Describe key developments and ideas in 20th Century art</li><li>• Access and use a range of relevant research sources</li><li>• Reference appropriately using Harvard style</li><li>• Format a bibliography correctly</li></ul> | <ul style="list-style-type: none"><li>• Discuss your field of practice by linking your concepts to the use of materials and processes</li><li>• Discuss the relationship between preliminary and resolved works</li><li>• Critically reflect on own work and the work of others</li><li>• Problem solve and evaluate technical processes</li><li>• Critically analyse key issues related to the topic</li><li>• Critically and reflectively analyse the chosen artwork(s)/exhibition(s)/art fair(s)/biennale(s)</li><li>• Evaluate and apply relevant theoretical material to the discussion of art works</li><li>• Connect the exhibition to contemporary practice and contemporary society</li><li>• Compare and contrast theories of practice</li><li>• Connect and synthesise knowledge to formulate and support a position</li><li>• Use language and terminology appropriate to an academic context</li><li>• Analyse the formal properties of an art work with reference to the social and historical context in which the work was made</li><li>• Identify critical moments of learning and divergent thinking through the making process</li></ul> | <ul style="list-style-type: none"><li>• Discuss and critique own work and work of others</li><li>• Curate space for the exhibition of artworks</li><li>• Attend to spatial relationships</li><li>• Develop a professional profile</li><li>• Write and negotiate proposals for creative work</li><li>• Write an artist’s statement</li><li>• Engage in work integrated learning activities</li><li>• Discuss the ethics of the profession</li><li>• Discuss the field of practice</li><li>• Build knowledge of the local and global industries</li><li>• Build knowledge of funding opportunities</li><li>• Write grant applications</li><li>• Engage with peers</li><li>• Collaborate with a group</li><li>• Give and receive peer feedback</li><li>• Form and sustain a peer learning group</li><li>• Form, develop and implement a vision and philosophy of art as a profession</li><li>• Develop collaborative modes of working and apply skills in teamwork, leadership and self-management</li><li>• Invent, design and construct a pro-active and critically relevant career</li><li>• Connect to and network with local arts industry</li></ul> |
